# Supplementary material for: Genome-Wide Association Studies Based on Equine Joint Angle Measurements Reveal New QTL Affecting the Conformation of Horses
Source: MDPI journal article supplement (doi:10.3390/genes10050370), 2019-05-14
Supplement: s1 [file s1]

**Table S2: Summary table of all GWAS**

| Trait                          | SNP name     | ECA | Position<br>EquCab 2 | Position<br>EquCab 3 | Number of<br>genotyped<br>horses | Alleles<br>(MAF)<br>overall | Alleles<br>(MAF)<br>FM | Alleles<br>(MAF) LIP | p-value  |
|--------------------------------|--------------|-----|----------------------|----------------------|----------------------------------|-----------------------------|------------------------|----------------------|----------|
| Poll                           | AX-103978374 | 28  | 12102163             | 13129283             | 495                              | 0.2980                      | 0.2095                 | 0.4171               | 1.36E-07 |
| Poll                           | AX-103396551 | 28  | 12101898             | 13129017             | 495                              | 0.2949                      | 0.2077                 | 0.4123               | 1.44E-07 |
| Poll                           | AX-103779310 | 1   | 124405158            | 125551151            | 495                              | 0.1606                      | 0.1514                 | 0.1730               | 6.83E-07 |
| Poll                           | AX-104440677 | 28  | 12106363             | 13133483             | 491                              | 0.2301                      | 0.1107                 | 0.3886               | 8.36E-07 |
| Elbow joint                    | AX-103649839 | 29  | 18799958             | 19878299             | 490                              | 0.2327                      | 0.1667                 | 0.3199               | 1.69E-07 |
| Carpal joint                   | AX-104691515 | 4   | 37412203             | 37460405             | 479                              | 0.2630                      | 0.1119                 | 0.4550               | 6.07E-07 |
| Carpal joint                   | AX-105008533 | 3   | 106128177            | 107955102            | 493                              | 0.2241                      | 0.0497                 | 0.4573               | 6.24E-07 |
| Carpal joint                   | AX-103944161 | 7   | 42659817             | 43694770             | 495                              | 0.2323                      | 0.1391                 | 0.3578               | 8.83E-07 |
| Fetlock joint of the fore limb | AX-104559840 | 23  | 49183107             | 48994679             | 494                              | 0.0820                      | 0.0813                 | 0.0829               | 1.28E-05 |
| Hip joint                      | AX-103391767 | 20  | 49183107             | 48994679             | 452                              | 0.0697                      | 0.1307                 | 0.0000               | 6.10E-06 |
| Stifle joint                   | AX-102974274 | 8   | 19266146             | 21704931             | 473                              | 0.2918                      | 0.1679                 | 0.4455               | 2.77E-07 |
| Hock joint                     | AX-103234126 | 21  | 30166547             | 31190691             | 490                              | 0.2980                      | 0.1900                 | 0.4408               | 9.21E-06 |
| Hock joint                     | AX-104124989 | 21  | 30263265             | 31287360             | 490                              | 0.2980                      | 0.1900                 | 0.4408               | 9.21E-06 |
| Fetlock joint of the hind limb | AX-103624054 | 27  | 22021462             | 22068848             | 495                              | 0.1131                      | 0.1338                 | 0.0853               | 5.42E-07 |

P-value; P-value of the most significantly associated SNP per trait and locus corrected for genomic inflation (Pc1df from GenABEL)
