# Supplementary material for: Genome-Wide Association Studies Based on Equine Joint Angle Measurements Reveal New QTL Affecting the Conformation of Horses
Source: MDPI journal article supplement (doi:10.3390/genes10050370), 2019-05-14
Supplement: s1 [file s1]

**Table S1: Summary of all genes near the identified QTL and their functions in humans based on the GeneCards database**

| Trait       | ECA | Genes near the QTL | Location of gene on EquCab2.0 | Location of gene on EquCab3.0 | Associated human phenotypes or diseases                                                                                                                                                                                                                                                                                                                                                      |
|-------------|-----|--------------------|-------------------------------|-------------------------------|----------------------------------------------------------------------------------------------------------------------------------------------------------------------------------------------------------------------------------------------------------------------------------------------------------------------------------------------------------------------------------------------|
| Poll        | 1   | <i>CORO2B</i>      | 124'181'094 – 124'310'067     | 125'326'866 – 125'463'477     | Diastolic and systolic blood pressure, neuropsychological tests                                                                                                                                                                                                                                                                                                                              |
|             |     | <i>ITGA11</i>      | 124'447'398 – 124'566'837     | 125'593'167 – 125'711'828     | Dupuytren contracture, systolic blood pressure, attention deficit hyperactivity disorder, unipolar depression, serum IgG glycolysation measurement                                                                                                                                                                                                                                           |
|             |     | <i>FEM1B</i>       | 124'572'574 – 124'587'241     | 125'716'242 – 125'733'251     | Dupuytren contracture, systolic blood pressure, unipolar depression                                                                                                                                                                                                                                                                                                                          |
|             | 28  | <i>LRRIQ1</i>      | 11'806'213 – 11'993'045       | 12'828'749 – 13'042'786       | Synophrys measurement, femoral neck bone mineral density                                                                                                                                                                                                                                                                                                                                     |
|             |     | <i>ALX1</i>        | 12'029'878 – 12'051'698       | 13'056'871 – 13'078'827       | Nose morphology measurement, femoral neck bone mineral density, Frontonasal dysplasia 3 (true ocular hypertelorism; broadening of the nasal root; median facial cleft affecting the nose and/or upper lip and palate; unilateral or bilateral clefting of the alae nasi; lack of formation of the nasal tip; anterior cranium bifidum occultum; a V-shaped or widow's peak frontal hairline) |
| Elbow joint | 29  | <i>RSU1</i>        | 18'575'605 – 18'751'396       | 19'648'682 – 19'829'810       | Platelet component distribution width, albuminuria, body height, migraine disorder, bone density                                                                                                                                                                                                                                                                                             |
|             |     | <i>C1QL3</i>       | 18'809'431 – 18'816'434       | 19'884'891 – 19'896'116       | Adolescent idiopathic scoliosis                                                                                                                                                                                                                                                                                                                                                              |
|             |     | <i>PTER</i>        | 18'818'433 – 18'874'900       | 19'896'602 – 19'953'158       | Obesity, adolescent idiopathic scoliosis, urate measurement, body mass index, bone fracture, osteoporosis, eye morphology measurement, Waardenburg Syndrome Type II (pigmentary abnormalities of the hair, skin, and eyes, congenital sensorineural hearing loss, and absence of lateral                                                                                                     |

|              |   |               |                         |                         |                                                                                                                                                                                                                                                                                                                   |
|--------------|---|---------------|-------------------------|-------------------------|-------------------------------------------------------------------------------------------------------------------------------------------------------------------------------------------------------------------------------------------------------------------------------------------------------------------|
|              |   |               |                         |                         | displacement of the inner canthus of each eye), Chromosome 16P13.3 Duplication Syndrome (possible symptoms include developmental delay, speech delay, joint abnormalities, characteristic facial features, attention deficit, autism spectrum disorders, and underlying health problems such as heart conditions) |
| Stifle joint | 8 | <i>LHX5</i>   | 19'133'640 – 19'142'420 | 21'571'080 – 21'580'907 | Neural crest differentiation, Transcriptional Regulatory Network in Embryonic Stem Cell, body mass index, erosive tooth wear measurement, cerebral amyloid deposition measurement, glomerular filtration rate, chronic kidney disease                                                                             |
|              |   | <i>SDSL</i>   | 19'159'497 – 19'173'479 | 21'597'005 – 21'610'807 | Body mass index, high density lipoprotein cholesterol measurement, parasagittal meningioma, cerebral convexity meningioma                                                                                                                                                                                         |
|              |   | <i>SDS</i>    | 19'181'653 – 19'190'469 | 21'619'157 – 21'627'979 | Salla disease (hypotonia, cerebellar ataxia, and mental retardation), heel bone mineral density, abnormality of the foot                                                                                                                                                                                          |
|              |   | <i>SLC8B1</i> | 19'233'776 – 19'251'178 | 21'664'510 – 21'690'376 | Body mass index, Plays a central role in mitochondrial calcium homeostasis by mediating mitochondrial calcium extrusion                                                                                                                                                                                           |
|              |   | <i>TPCN1</i>  | 19'251'807 – 19'309'032 | 21'690'593 – 21'750'208 | Thyroid gland disease, body mass index                                                                                                                                                                                                                                                                            |
|              |   | <i>IQCD</i>   | 19'312'105 – 19'338'590 | 21'750'459 – 21'776'876 | Body mass index                                                                                                                                                                                                                                                                                                   |
|              |   | <i>RITA1</i>  | 19'340'169 – 19'345'131 | 21'778'451 – 21'783'438 | Body mass index                                                                                                                                                                                                                                                                                                   |
|              |   | <i>DDX54</i>  | 19'344'935 – 19'364'848 | 21'783'672 – 21'803'059 | Body mass index, believed to be involved in embryogenesis, spermatogenesis, and cellular growth and division                                                                                                                                                                                                      |
|              |   | <i>CFAP73</i> | 19'364'941 – 19'372'019 | 21'803'025 – 21'810'252 | Body mass index,                                                                                                                                                                                                                                                                                                  |

|                                |    |                           |                         |                         |                                                                                                                                                                                                                                                                                                                 |
|--------------------------------|----|---------------------------|-------------------------|-------------------------|-----------------------------------------------------------------------------------------------------------------------------------------------------------------------------------------------------------------------------------------------------------------------------------------------------------------|
|                                |    | <i>RASAL1</i>             | 19'380'566 – 19'407'774 | 21'818'249 – 21'845'715 | Ossifying fibroma, juvenile ossifying fibroma, body mass index, visceral adipose tissue measurement, bone benign neoplasm, connective tissue benign neoplasm                                                                                                                                                    |
|                                |    | <i>DTX1</i>               | 19'408'742 – 19'414'443 | 21'846'683 – 21'882'543 | Body mass index, cups of coffee per day measurement, visceral adipose tissue measurement, pthirus pubis infestation, lice infestation                                                                                                                                                                           |
| Fetlock joint of the hind limb | 27 | <i>LOC106782668</i>       | 21'754'711-21'779'842   | 21'801'757 – 21'827'111 | -                                                                                                                                                                                                                                                                                                               |
|                                |    | <i>FRG1<sup>a</sup></i>   | 21'179'058 – 21'194'222 | 21'225'542 – 21'240'706 | Fascioscapulohumeral muscular dystrophy 1, suppurative lymphadenitis, albuminuria, infant cerebrospinal fluid volume measurement, periodontitis                                                                                                                                                                 |
|                                |    | <i>TRIML1<sup>a</sup></i> | 22'586'442 – 22'592'120 | 22'638'484 – 22'644'276 | Unknown function, associated with unipolar depression, response to selective serotonin reuptake inhibitor, polycystic ovary syndrome                                                                                                                                                                            |
| Carpal joint                   | 4  | <i>CALCR</i>              | 37'066'892 – 37'131'479 | 37'113'944 – 37'258'137 | Smoking behaviour, body mass index, physical activity measurement, hip circumference, birth weight, lean body mass, longitudinal BMI measurement, osteoporosis, bone mineral density quantitative trait locus 15 (osteoporosis, compression fractures (in homozygotes), metaphyseal fractures (in homozygotes)) |
|                                |    | <i>TFPI2</i>              | 37'492'134 – 37'497'226 | 37'540'549 – 37'545'506 | Resting heart rate, heart rate variability measurement, heart rate response to recovery post exercise, heart rate, fibrosarcoma, malignant ovarian cyst                                                                                                                                                         |
|                                |    | <i>GNGT1</i>              | 37'511'109 – 37'515'625 | 37'573'575 – 37'578'274 | Resting heart rate, heart rate response to recovery post exercise, peripheral neuropathy, breast carcinoma, response to taxane, mosquito bite reaction size measurement, intelligence, Fructose-1,6-Bisphosphatase Deficiency, Retinitis Pigmentosa, Beta-Adrenergic                                            |

|  |   |                |                           |                           |                                                                                                                                                                                                                                                  |
|--|---|----------------|---------------------------|---------------------------|--------------------------------------------------------------------------------------------------------------------------------------------------------------------------------------------------------------------------------------------------|
|  |   |                |                           |                           | Signaling, Development Dopamine D2 receptor transactivation of EGFR.                                                                                                                                                                             |
|  |   | <i>GNG11</i>   | 37'525'240 – 37'529'942   | 37'559'440 – 37'564'022   | Resting heart rate, heart rate variability measurement, heart rate response to recovery post exercise, heart rate, mosquito bite reaction size measurement, beta-adrenergic signalling, Development Dopamine D2 receptor transactivation of EGFR |
|  |   | <i>BET1</i>    | 37'601'073 – 37'611'154   | 37'649'405 – 37'659'486   | Aging, aspartate aminotransferase measurement, serum alanine aminotransferase measurement, athletic endurance measurement, asparagine hypersensitivity, acute lymphoblastic leukemia                                                             |
|  | 3 | <i>LCORL</i>   | 105'610'345 – 105'758'257 | 107'434'521 – 107'586'075 | Body weight, birth weight, infant body height, heel bone mineral density, hip circumference, body mass index                                                                                                                                     |
|  |   | <i>NCAPG</i>   | 105'760'185 – 105'798'927 | 107'585'988 – 107'624'685 | Body height, intelligence                                                                                                                                                                                                                        |
|  |   | <i>DCAF16</i>  | 105'799'114 – 105'810'550 | 107'624'628 – 107'636'350 | Body height, infant body height                                                                                                                                                                                                                  |
|  |   | <i>FAM184B</i> | 105'868'358 – 105'947'671 | 107'651'393 – 107'771'418 | Body height, infant body height, parasitemia measurement, Trypanosoma cruzi seropositivity                                                                                                                                                       |
|  |   | <i>MED28</i>   | 105'945'793 – 105'958'797 | 107'772'430 – 107'784'432 | Infant body height                                                                                                                                                                                                                               |
|  |   | <i>LAP3</i>    | 105'964'213 – 105'989'446 | 107'789'841 – 107'815'074 | Bacterial Vaginosis, Nephronophthisis-Like Nephropathy 1                                                                                                                                                                                         |
|  |   | <i>CLRN2</i>   | 106'026'205 – 106'037'711 | 107'851'793 – 107'863'374 | Blood protein measurement                                                                                                                                                                                                                        |
|  |   | <i>QDPR</i>    | 106'043'788 – 106'058'192 | 107'867'051 – 107'883'749 | Blood protein measurement, response to carboplatin, Hyperphenylalaninemia Bh4-Deficient C, Phenylketonuria                                                                                                                                       |
|  | 7 | <i>SPATA19</i> | 42'022'512 – 42'028'471   | 43'056'446 – 43'062'429   | susceptibility to childhood ear infection measurement                                                                                                                                                                                            |
|  |   | <i>IGSF9B</i>  | 42'067'916 – 42'123'524   | 43'097'490 – 43'157'010   | Schizophrenia, intelligence, autism spectrum disorder, smoking status measurement, diastolic blood pressure, migraine disorder                                                                                                                   |

|  |  |               |                         |                         |                                                                                                                                                                                                                                                                                                                                                                                     |
|--|--|---------------|-------------------------|-------------------------|-------------------------------------------------------------------------------------------------------------------------------------------------------------------------------------------------------------------------------------------------------------------------------------------------------------------------------------------------------------------------------------|
|  |  | <i>JAM3</i>   | 42'275'597 – 42'293'136 | 43'261'488 – 43'326'636 | Velopharyngeal dysfunction, schizophrenia, Hemorrhagic Destruction Of The Brain Subependymal Calcification and Cataracts                                                                                                                                                                                                                                                            |
|  |  | <i>NCAPD3</i> | 42'292'967 – 42'357'868 | 43'327'274 – 43'392'559 | Microcephaly 22 Primary Autosomal Recessive (short stature, microcephaly, limb hypertonia, poor overall growth, normal to moderate developmental delay, seizures), Joubert Syndrome 8 (cerebellar ataxia, oculomotor apraxia, hypotonia, neonatal breathing abnormalities and psychomotor delay), word list delayed recall measurement, memory performance, neuropsychological test |
|  |  | <i>VPS26B</i> | 42'359'345 – 42'380'825 | 43'392'844 – 43'414'411 | Late-Onset Parkinson Disease, word list delayed recall measurement, memory performance                                                                                                                                                                                                                                                                                              |
|  |  | <i>THYN1</i>  | 42'381'262 – 42'386'993 | 43'414'848 – 43'420'597 | -                                                                                                                                                                                                                                                                                                                                                                                   |
|  |  | <i>ACAD8</i>  | 42'378'469 – 42'402'889 | 43'412'036 – 43'436'475 | Isobutyryl-CoA Dehydrogenase Deficiency, Deficiency Of Short-Chain Acyl-CoA Dehydrogenase, fasting blood insulin measurement, amino acid measurement                                                                                                                                                                                                                                |
|  |  | <i>B3GAT1</i> | 42'666'260 – 42'696'496 | 43'701'213 – 43'731'984 | Renal Adenoma, Natural Killer Cell Leukemia, N-Glycan measurement, prostate carcinoma, schizophrenia, alcohol drinking, word list delayed recall measurement, memory performance                                                                                                                                                                                                    |

<sup>a</sup> Surrounding genes closest to the QTL
