# Supplementary material for: Genome-Wide Association Studies Based on Equine Joint Angle Measurements Reveal New QTL Affecting the Conformation of Horses
Source: MDPI journal article supplement (doi:10.3390/genes10050370), 2019-05-14
Supplement: s1 [file s1]

## File S1 Model evaluation for GWAS

$$y_i = \mu + \beta_{i,j} \times (g_i \times \text{kin})$$

where  $g$  is the genotype of the individual  $i$ ,  $\text{kin}$  is the kinship matrix,  $\mu$  is the grand population mean (intercept) and  $\beta_j$  are the relevant covariates

|           |                                |
|-----------|--------------------------------|
| $\beta_1$ | Stud farm                      |
| $\beta_2$ | Birth year category            |
| $\beta_3$ | Age Category                   |
| $\beta_4$ | Sex                            |
| $\beta_5$ | Head height                    |
| $\beta_6$ | Head in relation to the camera |
| $\beta_7$ | Position of front limb         |
| $\beta_8$ | Position of hind limb          |
| $\beta_9$ | Body alignment to the camera   |
| $B_{10}$  | Tail position                  |

### S1.1 Poll angle

Summary of fixed effects estimates

|                                       | Estimate        | SE             | t-value       | p-value        |
|---------------------------------------|-----------------|----------------|---------------|----------------|
| <i>Intercept</i>                      | 104.61906       | 2.48205        | 42.150        | <0.0001        |
| Stud farm                             | -0.02361        | 0.34505        | -0.068        | 0.94548        |
| Birth year category                   | -0.45611        | 0.32852        | -1.388        | 0.16598        |
| <b>Age category</b>                   | <b>0.63858</b>  | <b>0.19954</b> | <b>3.200</b>  | <b>0.00151</b> |
| <b>Sex</b>                            | <b>1.28069</b>  | <b>0.60799</b> | <b>2.106</b>  | <b>0.03594</b> |
| Head height                           | -0.82122        | 0.58836        | -1.396        | 0.16375        |
| <b>Head in relation to the camera</b> | <b>0.73798</b>  | <b>0.23912</b> | <b>3.086</b>  | <b>0.00220</b> |
| Position of front limb                | -0.04052        | 0.23783        | -0.170        | 0.86483        |
| Position of hind limb                 | 0.20609         | 0.24673        | 0.835         | 0.40417        |
| <b>Body alignment to the camera</b>   | <b>-0.65229</b> | <b>0.31906</b> | <b>-2.044</b> | <b>0.04172</b> |
| <b>Tail position</b>                  | <b>-1.72304</b> | <b>0.54136</b> | <b>-3.183</b> | <b>0.00160</b> |

### S1.2 Elbow joint angle

Summary of fixed effects estimates

|                                     | Estimate       | SE            | t-value       | p-value           |
|-------------------------------------|----------------|---------------|---------------|-------------------|
| <i>Intercept</i>                    | 141.2325       | 3.0331        | 46.564        | < 0.0001          |
| Stud farm                           | 0.4934         | 0.4135        | 1.193         | 0.23358           |
| Birth year category                 | 0.5727         | 0.4015        | 1.426         | 0.15476           |
| Age category                        | -0.3879        | 0.2443        | -1.588        | 0.11329           |
| Sex                                 | -1.4567        | 0.7437        | -1.959        | 0.05098           |
| Head height                         | -1.3872        | 0.7206        | -1.925        | 0.05506           |
| Head in relation to the camera      | -0.2896        | 0.293         | -0.988        | 0.3238            |
| <b>Position of front limb</b>       | <b>-1.6461</b> | <b>0.2911</b> | <b>-5.655</b> | <b>&lt;0.0001</b> |
| Position of hind limb               | -0.54          | 0.3021        | -1.787        | 0.07479           |
| <b>Body alignment to the camera</b> | <b>-1.0562</b> | <b>0.3909</b> | <b>-2.702</b> | <b>0.00725</b>    |
| Tail position                       | 0.3991         | 0.6625        | 0.602         | 0.54727           |

### S1.3 Carpal joint angle

Summary of fixed effects estimates

|                                | Estimate      | SE             | t-value      | p-value            |
|--------------------------------|---------------|----------------|--------------|--------------------|
| <i>Intercept</i>               | 176.2778      | 0.894609       | 197.045      | < 0.0001           |
| Stud farm                      | 0.023023      | 0.123869       | 0.186        | 0.853              |
| Birth year category            | -0.00251      | 0.118413       | -0.021       | 0.983              |
| Age category                   | 0.090519      | 0.071949       | 1.258        | 0.209              |
| <b>Sex</b>                     | <b>1.0416</b> | <b>0.21918</b> | <b>4.752</b> | <b>&lt; 0.0001</b> |
| Head height                    | -0.04098      | 0.212162       | -0.193       | 0.847              |
| Head in relation to the camera | -0.15851      | 0.086236       | -1.838       | 0.067              |
| Position of front limb         | 0.009347      | 0.085749       | 0.109        | 0.91               |
| Position of hind limb          | 0.102076      | 0.088966       | 1.147        | 0.252              |
| Body alignment to the camera   | 0.15116       | 0.11506        | 1.314        | 0.19               |
| Tail position                  | -0.1521       | 0.19518        | -0.779       | 0.436              |

### S1.4 Fetlock joint angle of the forelimb

Summary of fixed effects estimates

|                                | Estimate       | SE             | t-value      | p-value        |
|--------------------------------|----------------|----------------|--------------|----------------|
| <i>Intercept</i>               | 146.8066       | 2.13286        | 68.831       | < 0.0001       |
| Stud farm                      | 0.28005        | 0.29437        | 0.951        | 0.34212        |
| Birth year category            | -0.23838       | 0.28232        | -0.844       | 0.3991         |
| Age category                   | 0.15338        | 0.17158        | 0.894        | 0.37204        |
| <b>Sex</b>                     | <b>1.5692</b>  | <b>0.52263</b> | <b>3.002</b> | <b>0.00289</b> |
| Head height                    | 0.09664        | 0.506          | 0.191        | 0.84865        |
| Head in relation to the camera | -0.07419       | 0.20569        | -0.361       | 0.71857        |
| Position of front limb         | 0.30341        | 0.20449        | 1.484        | 0.14           |
| <b>Position of hind limb</b>   | <b>0.53665</b> | <b>0.21218</b> | <b>2.529</b> | <b>0.0119</b>  |
| Body alignment to the camera   | -0.41089       | 0.27443        | -1.497       | 0.1353         |
| Tail position                  | -0.18696       | 0.46544        | -0.402       | 0.68818        |

### S1.5 Hip joint angle

Summary of fixed effects estimates

|                                     | Estimate        | SE             | t-value        | p-value            |
|-------------------------------------|-----------------|----------------|----------------|--------------------|
| <i>Intercept</i>                    | 82.63606        | 1.39918        | 59.061         | < 0.0001           |
| Stud farm                           | -0.09943        | 0.19169        | -0.519         | 0.60431            |
| <b>Birth year category</b>          | <b>-0.6051</b>  | <b>0.18522</b> | <b>-3.267</b>  | <b>0.001202</b>    |
| Age category                        | -0.15258        | 0.11263        | -1.355         | 0.176472           |
| <b>Sex</b>                          | <b>-0.7404</b>  | <b>0.34298</b> | <b>-2.159</b>  | <b>0.031593</b>    |
| Head height                         | -0.2887         | 0.33222        | -0.869         | 0.385474           |
| Head in relation to the camera      | 0.06353         | 0.13508        | 0.47           | 0.63842            |
| Position of front limb              | -0.06525        | 0.13423        | -0.486         | 0.63               |
| <b>Position of hind limb</b>        | <b>-1.85089</b> | <b>0.13929</b> | <b>-13.288</b> | <b>&lt; 0.0001</b> |
| <b>Body alignment to the camera</b> | <b>0.63432</b>  | <b>0.1802</b>  | <b>3.52</b>    | <b>0.000492</b>    |
| Tail position                       | 0.5177          | 0.30549        | 1.695          | 0.091088           |

## S1.6 Stifle joint angle

Summary of fixed effects estimates

|                                       | Estimate      | SE            | t-value       | p-value           |
|---------------------------------------|---------------|---------------|---------------|-------------------|
| <i>Intercept</i>                      | 86.3356       | 1.8994        | 45.454        | < 0.0001          |
| Stud farm                             | 0.2866        | 0.2631        | 1.089         | 0.276818          |
| Birth year category                   | 0.2539        | 0.2514        | 1.01          | 0.313351          |
| <b>Age category</b>                   | <b>0.5486</b> | <b>0.1528</b> | <b>3.592</b>  | <b>0.000379</b>   |
| Sex                                   | -0.3919       | 0.4653        | -0.842        | 0.400278          |
| Head height                           | 0.4822        | 0.4504        | 1.07          | 0.285198          |
| <b>Head in relation to the camera</b> | <b>0.4427</b> | <b>0.1831</b> | <b>2.418</b>  | <b>0.016149</b>   |
| Position of front limb                | 0.1138        | 0.1821        | 0.625         | 0.53              |
| <b>Position of hind limb</b>          | <b>1.9411</b> | <b>0.1889</b> | <b>10.277</b> | <b>&lt;0.0001</b> |
| <b>Body alignment to the camera</b>   | <b>1.3655</b> | <b>0.2443</b> | <b>5.59</b>   | <b>&lt;0.0001</b> |
| Tail position                         | 0.6183        | 0.4144        | 1.492         | 0.136622          |

## S1.7 Hock angle

Summary of fixed effects estimates

|                                | Estimate        | SE             | t-value       | p-value            |
|--------------------------------|-----------------|----------------|---------------|--------------------|
| <i>Intercept</i>               | 153.6902        | 1.15834        | 132.681       | < 0.0001           |
| Stud farm                      | 0.03015         | 0.15974        | 0.189         | 0.8504             |
| Birth year category            | 0.10144         | 0.15333        | 0.662         | 0.5087             |
| Age category                   | 0.10509         | 0.09319        | 1.128         | 0.2603             |
| Sex                            | 0.48366         | 0.28385        | 1.704         | 0.0894             |
| Head height                    | -0.0679         | 0.27483        | -0.247        | 0.805              |
| Head in relation to the camera | 0.13307         | 0.11172        | 1.191         | 0.2345             |
| Position of front limb         | -0.06313        | 0.11107        | -0.568        | 0.57               |
| <b>Position of hind limb</b>   | <b>-1.08524</b> | <b>0.11524</b> | <b>-9.417</b> | <b>&lt; 0.0001</b> |
| Body alignment to the camera   | 0.24681         | 0.14906        | 1.656         | 0.0987             |
| Tail position                  | 0.1087          | 0.25279        | 0.43          | 0.6675             |

## S1.8 Fetlock joint angle of the hind limb

Summary of fixed effects estimates

|                                | Estimate        | SE             | t-value       | p-value            |
|--------------------------------|-----------------|----------------|---------------|--------------------|
| <i>Intercept</i>               | 159.8484        | 2.55466        | 62.571        | < 0.0001           |
| <b>Stud farm</b>               | <b>0.71303</b>  | <b>0.35974</b> | <b>1.982</b>  | <b>0.04834</b>     |
| Birth year category            | 0.04059         | 0.33806        | 0.12          | 0.9045             |
| Age category                   | 0.22598         | 0.20512        | 1.102         | 0.27144            |
| Sex                            | 1.18081         | 0.62537        | 1.888         | 0.05992            |
| Head height                    | -0.4693         | 0.60467        | -0.776        | 0.43826            |
| Head in relation to the camera | -0.25714        | 0.24564        | -1.047        | 0.29598            |
| <b>Position of front limb</b>  | <b>-1.18611</b> | <b>0.2445</b>  | <b>-4.851</b> | <b>&lt; 0.0001</b> |
| <b>Position of hind limb</b>   | <b>-0.73777</b> | <b>0.25361</b> | <b>-2.909</b> | <b>0.00388</b>     |
| Body alignment to the camera   | 0.2483          | 0.32782        | 0.757         | 0.44936            |
| Tail position                  | -0.89216        | 0.55668        | -1.603        | 0.11001            |
