# Supplementary material for: Genome-Wide Association Studies Based on Equine Joint Angle Measurements Reveal New QTL Affecting the Conformation of Horses
Source: MDPI journal article supplement (doi:10.3390/genes10050370), 2019-05-14

**Figure S1:** Differences in the mean shape of 20 Lipizzan horses digitized by author A.I.G. (orange) and author T.D. (red) by superimposition

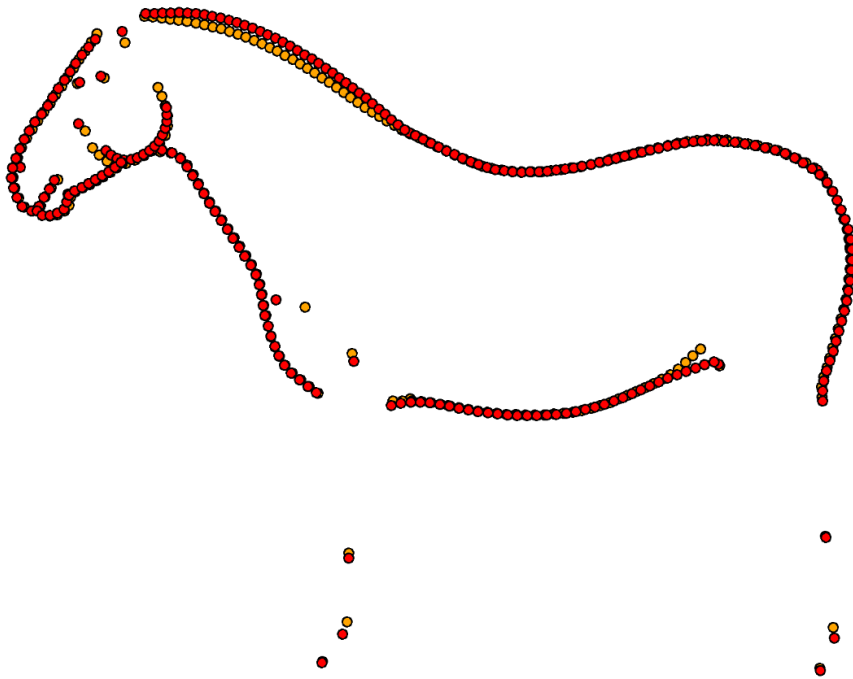

Supplement: s1 [file s1]
