# Supplementary material for: Genome-Wide Association Studies Based on Equine Joint Angle Measurements Reveal New QTL Affecting the Conformation of Horses
Source: Genes (Basel). 2019 May 14;10(5):370. doi: 10.3390/genes10050370 (PMC6562990; doi:10.3390/genes10050370)
Supplement: Supplementary file 1 [file genes-10-00370-s001.zip]

Archive with 5 entries (5 files):
- Figure S1.pdf
- Figure S2.pdf
- File S1.pdf
- Table S1.pdf
- Table S2.pdf
